# Supplementary material for: Highly efficient yellow phosphorescent OLEDs based on two novel bipolar host materials
Source: Royal Society of Chemistry journal article supplement (doi:10.1039/c5nj00939a), 2015-01-01
Supplement: c5nj00939a1.pdf [file c5nj00939a1.pdf]

## Supplementary Information

### Highly efficient yellow phosphorescent OLEDs based on two novel bipolar hosts

Song Zhang, Xuan Liu, Qiu-Lei Xu, Yi-Ming Jing, Guang-Zhao Lu, Xiao Liang, You-Xuan Zheng\*, Jing-Lin Zuo

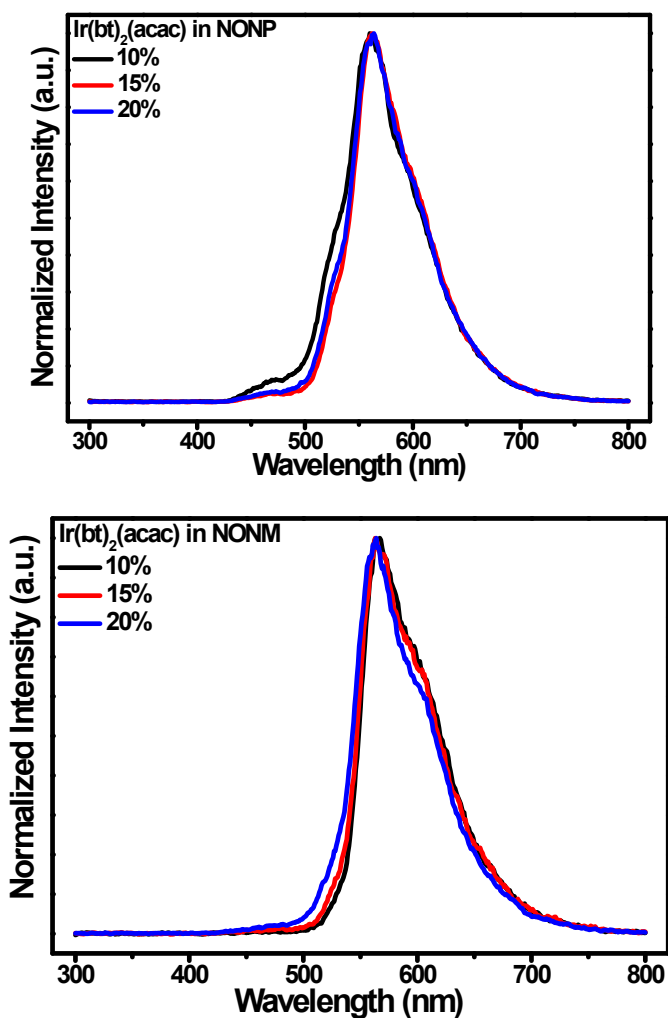

**Fig. S1.** The normalized emission spectra of Ir(bt)<sub>2</sub>(acac) doped in NONP and NONM dichloromethane solutions with different doped concentrations.

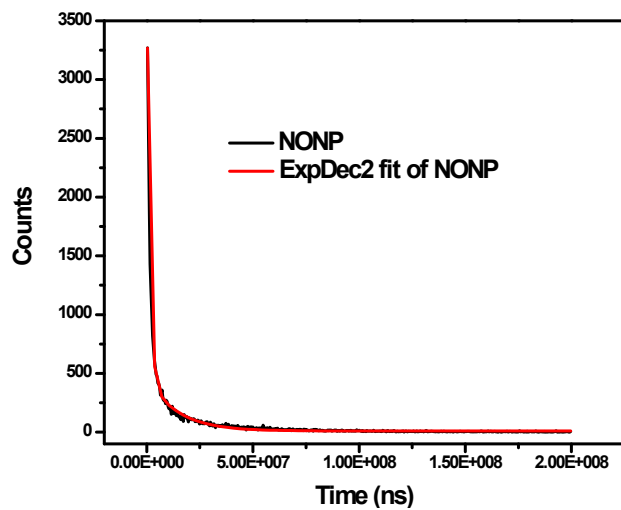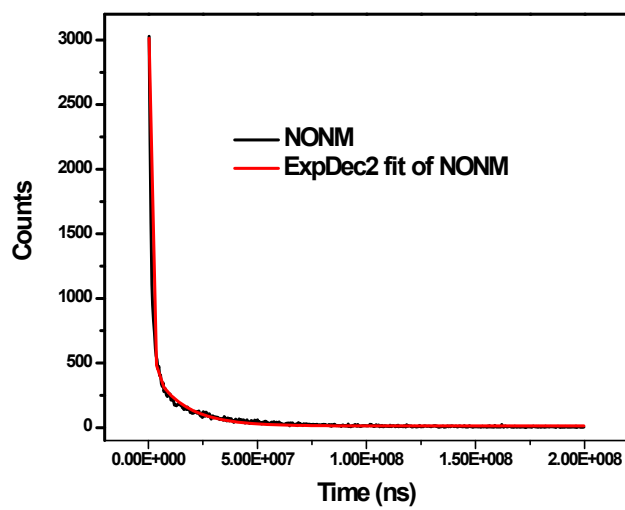

**Fig. S2** Phosphorescence decays of **NONP** and **NONM** at 40 K.
